# Supplementary material for: A new approach for measuring the carbon and oxygen content of atmospherically-relevant compounds and mixtures
Source: Copernicus journal article supplement (doi:10.5194/amt-2020-44), 2020-03-04
Supplement: Supplementary file 1 [file Hurley AMT 2020 Supp Data.xlsx]

## Sheet: Sheet1
#	Compound	CAS #	Formula	O/C	Norm FID/CO2	ECN	Relative ECN
1	Heptane	142-82-5	C7H16	0	0.960151	7	1
2	Octane	111-65-9	C8H18	0	0.987076	8	1
3	Nonane	111-84-2	C9H20	0	0.983196	9	1
4	Decane	124-18-5	C10H22	0	1.00002	10	1
5	Undecane	1120-21-4	C11H24	0	1.00839	11	1
6	Dodecane	112-40-3	C12H26	0	1.00677	12	1
7	Tridecane	629-50-5	C13H28	0	1.01961	13	1
8	Tetradecane	629-59-4	C14H30	0	1.00097	14	1
9	Pentadecane	629-62-9	C15H32	0	1.01785	15	1
10	Hexadecane	544-76-3	C16H34	0	1.0067	16	1
11	Heptadecane	629-78-7	C17H36	0	1.00974	17	1
12	Octadecane	593-45-3	C18H38	0	1.01733	18	1
13	Nonadecane	629-92-5	C19H40	0	0.996566	19	1
14	Icosane	112-95-8	C20H42	0	0.967396	20	1
15	Henicosane	629-94-7	C21H44	0	1.00495	21	1
16	Docosane	629-97-0	C22H46	0	1.00903	22	1
17	Tricosane	638-67-5	C23H48	0	1.00619	23	1
18	Tetracosane	646-31-1	C24H50	0	0.985625	24	1
19	Pentacosane	629-99-2	C25H52	0	0.999706	25	1
20	Limonene	138-86-3	C10H16	0	0.929901	9.8	0.98
21	1,2,4-Trimethylbenzene	95-63-6	C9H12	0	0.99	9	1
22	Naphthalene	91-20-3	C10H8	0	0.992	10	1
23	Isophytol	505-32-8	C20H40O	0.05	0.952672	19.65	0.9825
24	Patchouli alcohol	5986-55-0	C15H26O	0.0666667	0.959025	14.75	0.983333
25	Butylated hydroxytoluene	128-37-0	C15H24O	0.0666667	0.932987	14.36	0.957333
26	alpha-Cetone	127-51-5	C14H22O	0.0714286	0.93573	12.8	0.914286
27	Methyl ionone	7779-30-8	C14H22O	0.0714286	0.919504	12.8	0.914286
28	2-Dodecanol	10203-28-8	C12H26O	0.0833333	0.911821	11.25	0.9375
29	Phytol acetate	10236-16-5	C22H42O2	0.0909091	0.924484	20.9	0.95
30	Linalool	78-70-6	C10H18O	0.1	0.958437	9.55	0.955
31	alpha-Terpineol	98-55-5	C10H18O	0.1	0.928952	9.65	0.965
32	Citronellal	106-22-9	C10H20O	0.1	0.950171	9.4	0.94
33	2-Naphthol	135-19-3	C10H8O	0.1	0.9415	9.36	0.936
34	2-Nonanone	821-55-6	C9H18O	0.111111	0.888237	8	0.888889
35	1-Octanol	111-87-5	C8H18O	0.125	0.920859	7.5	0.9375
36	Phenylethyl alcohol	60-12-8	C8H10O	0.125	0.933397	7.5	0.9375
37	Tetradecanoic acid ethyl ester	124-06-1	C16H32O2	0.125	0.897323	15	0.9375
38	2-Hydroxycyclopentadecanone	4727-18-8	C15H28O2	0.133333	0.933959	13.25	0.883333
39	1,1,-Dimethyl-2-Phenyl ester butanoic acid	10094-34-5	C14H20O2	0.142857	0.955622	13	0.928571
40	Benzyl benzoate	120-51-4	C14H12O2	0.142857	0.918117	13	0.928571
41	2-Heptanone	110-43-0	C7H14O	0.143	0.868333	6	0.857143
42	Methyl laurate	111-82-0	C13H26O2	0.153846	0.887892	12	0.923077
43	4-Tertbutyl cyclohexyl acetate	32210-23-4	C12H22O2	0.166667	0.910693	11	0.916667
44	Benzene ethanol, alpha,alpha-dimethyl acetate	151-05-3	C12H16O2	0.166667	0.873906	11	0.916667
45	Linalyl acetate	115-95-7	C12H20O2	0.166667	0.934623	10.8	0.9
46	Hexanal	66-25-1	C6H12O	0.167	0.8509	5	0.833333
47	Peach lactone	104-67-6	C11H20O2	0.181818	0.850063	10	0.909091
48	meta-Eugenol	50-19-9	C10H12O2	0.181818	0.877708	8.48	0.848
49	3,5,5- Trimethyl hexyl acetate	58430-94-7	C11H22O2	0.181818	0.944855	10	0.909091
50	Safrole	94-59-7	C10H10O2	0.2	0.8632	8.34	0.834
51	Eugenol	97-53-0	C10H12O2	0.2	0.945814	8.48	0.848
52	Allyl heptanoate	142-19-8	C10H18O2	0.2	0.907036	8.9	0.89
53	2-Methoxy-3-(2-Propenyl) phenol	1941_12-4	C10H12O2	0.2	0.912109	8.48	0.848
54	Hydroxy-citronellal	107-75-5	C10H20O2	0.2	0.84495	8.75	0.875
55	Benzene methanol alpha-methyl acetate	93-92-5	C10H12O2	0.2	0.859214	9	0.9
56	Benzyl salicylate	118-58-1	C14H12O3	0.214286	0.871135	12.36	0.882857
57	Benzyl acetate	140-11-4	C9H10O2	0.222222	0.916895	8	0.888889
58	Hexanoic acid, propenyl ester	123-68-2	C9H16O2	0.222222	0.816199	7.9	0.877778
59	Hedione	24851-98-7	C13H22O3	0.230769	0.886469	11	0.846154
60	2-Phenoxyethyl isobutyrate	103-60-6	C12H16O3	0.25	0.87943	10	0.833333
61	2-Hydroxy-2-Methylbutyl ester benzoic acid	51115-63-0	C12H16O3	0.25	0.856997	10.36	0.863333
62	Isoamyl salicylate	87-20-7	C12H16O3	0.25	0.809714	10.36	0.863333
63	Acetic acid, Hexyl ester	142-92-7	C8H16O2	0.25	0.801614	7	0.875
64	Strawberry aldehyde	77-83-8	C12H14O3	0.25	0.819905	10	0.833333
65	Indan-1,3-Monopropionate		C12H14O3	0.25	0.904015	10.25	0.854167
66	1-Butanol	71-36-3	C4H10O	0.25	0.874	3.5	0.875
67	Ethylene brassylate	105-95-3	C15H26O4	0.266667	0.839879	13	0.866667
68	Myristicin	607-91-0	C11H12O3	0.272727	0.809463	8.56	0.778182
69	Indan-1,3-Diol monoacetate		C11H12O3	0.272727	0.882166	9.25	0.840909
70	Prenyl acetate	1191-16-8	C7H12O2	0.285714	0.802648	5.9	0.842857
71	Isopropanol	67-63-0	C3H8O	0.333	0.71	2.25	0.75
72	1-Propanol	71-23-8	C3H8O	0.333	0.859	2.5	0.833333
73	Diethyl phthalate	84-66-2	C12H14O4	0.333333	0.841135	10	0.833333
74	Ethyl vanillin	121-32-4	C9H10O3	0.333333	0.885948	6.78	0.753333
75	Vanillin	121-33-5	C8H8O3	0.375	0.778327	5.78	0.7225
76	Piperonal	120-57-0	C8H6O3	0.375	0.793242	5.64	0.705
77	Isopropyl acetate	108-21-4	C5H10O2	0.4	0.73155	4	0.8
78	Syringaldehyde	134-96-3	C9H10O4	0.444444	0.750892	5.8	0.644444
79	Maltol	118-71-8	C6H6O3	0.5	0.730301	3.78	0.63
80	1-Methoxy-2-Propanol	107-98-2	C4H10O2	0.5	0.631	2.25	0.5625
81	Ethyl acetoacetate ethylene ketal	6413_10-1	C8H14O4	0.5	0.615955	5	0.625
82	5-Hydroxymethyl-2-(Dimethoxymethyl)furan	90200-14-9	C8H12O4	0.5	0.773402	4.78	0.5975
83	HEM (Hydroxyethyl methacrylate)	868-77-9	C6H10O3	0.5	0.662	4.4	0.733333
84	Ethanol	64-17-5	C2H6O	0.5	0.807	1.5	0.75
85	Propylene glycol	57-55-6	C3H8O2	0.666667	0.613	1.75	0.583333
86	Hydroxyacetone	116-09-6	C3H6O2	0.666667	0.596	1.5	0.5
87	Pentaerythritol	115-77-5	C5H12O4	0.8	0.656	3	0.6
88	Acetic acid	64-19-7	C2H4O2	1	0.5413	1	0.5
89	Glycerol	56-81-5	C3H8O3	1	0.382	1.25	0.416667
	Discards							Notes
	Methanol	67-56-1	CH4O	1	0.735	0.5	0.5	Anomalous behavior (see Holm, 1997)
	Musk Ketone	81-14-1	C14H18N2O5	0.357	0.844	NA	NA	Only compound with nitrogen, ECN uncertain
